# Supplementary material for: NH$_2$ PRODUCT DISTRIBUTIONS FROM THE NONADIABATIC PHOTODISSOCIATION DYNAMICS OF AMMONIA
Source: Royal Society of Chemistry journal article supplement (doi:10.1039/d4dt00593g), 2006-01-01
Supplement: d4dt00593g1.pdf [file d4dt00593g1.pdf]

## **Thermal and protonation-induced electron transfer coupled spin transition in discrete [Fe<sub>2</sub>Co<sub>3</sub>] Prussian Blue Analogue**

Jyoti Yadav<sup>a</sup>, Monojit Nandi<sup>a</sup>, Ranjan Kharel<sup>a</sup>, Moubani Mukherjee<sup>a</sup>, Sanjit Konar<sup>\*a</sup>

- a. Department of Chemistry, Indian Institute of Science Education and Research Bhopal, Bhuri, Bhopal-462066, Madhya Pradesh, India  
Email: skonar@iiserb.ac.in

# Table of Contents

|                                                          |       |
|----------------------------------------------------------|-------|
| 1. Experimental Details                                  | 3-4   |
| 1.1. Methods                                             | 3     |
| 1.2. Synthetic procedures                                | 3     |
| 1.2.1. Synthesis of ligand (L)                           | 3     |
| 1.2.2. Synthesis of complex <b>1</b> ·20H <sub>2</sub> O | 4     |
| 1.3. Physical measurements                               | 4-5   |
| 2. Result and Discussion                                 | 6-21  |
| 2.1. Crystal structure determination                     | 6-8   |
| 2.2. Crystallographic details                            | 9-12  |
| 2.3. Solid-state UV-visible spectroscopic study          | 12    |
| 2.4. Magnetic study                                      | 13    |
| 2.5. Differential scanning calorimetric study            | 13    |
| 2.6. Infrared spectroscopic studies with acid addition   | 14    |
| 2.7. <sup>1</sup> H-NMR study                            | 15-18 |
| 2.8. Thermogravimetric analysis                          | 19    |
| 2.9. Cyclic voltammetry                                  | 20-21 |
| 3. References                                            | 21    |

## 1. Experimental Details:

### 1.1. Materials:

The metal salts were purchased from Aldrich and used as received. All other chemicals 4-(trifluoromethyl)aniline, Sodium methoxide and 2-cyanopyridine were procured from S.D. Fine Chemicals, India. All solvents used were at least reagent grade. All the reactions were performed in air unless otherwise stated.

### 1.2. Synthetic procedures:

#### 1.2.1. Synthesis of ligand (L) (Z)-N'-(4-(trifluoromethyl)phenyl)picolinimidamide:

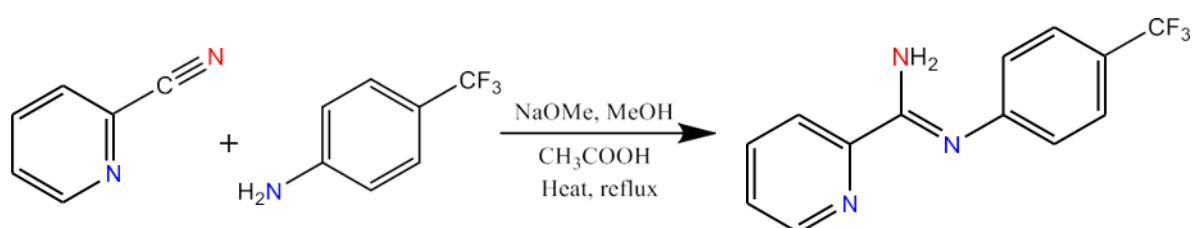

**Scheme 1.** Synthesis of ligand(L).

The ligand was prepared by reacting 2-cyanopyridine and 4-(trifluoromethyl)aniline in one-pot synthesis. An excess amount of sodium methoxide (0.35 g, 7 mmol) was dissolved in 25 ml of CH<sub>3</sub>OH and heated at 50°C for ~10 minutes to obtain a clear solution. To this reaction mixture, 2-cyanopyridine (0.48 mL, 5 mmol) was added slowly and refluxed at 70 °C for 1 hour. 4-(trifluoromethyl)aniline (0.63 mL, 5 mmol) was added followed by addition of 0.1 mL of glacial acetic acid in the reaction mixture. The reaction mixture was refluxed for overnight. The pale-yellow solution was filtered and dried by rotatory evaporator. The product was washed with diethyl-ether and hexane several times and left for evaporation. Pale yellow crystals of the product was obtained with a yield of 60 %.

**IR data (cm<sup>-1</sup>):**  $\nu_{\text{N-H}} = 3486.33$ ;  $\nu_{\text{C-H}} = 2926.53$ ;  $\nu_{\text{C=N}} = 1637.47$ ;  $\nu_{\text{C-F}} = 1241.34$ .

#### 1.2.2. Synthesis of complex {[Co(L)<sub>2</sub>]<sub>3</sub>[Fe(CN)<sub>6</sub>]<sub>2</sub>·20H<sub>2</sub>O (1·20H<sub>2</sub>O):

26.52 mg (0.1 mmol) of ligand (L) was dissolved in 5 mL of CH<sub>3</sub>OH into which 17 mg (0.05 mmol) of Co(BF<sub>4</sub>)<sub>2</sub>·6H<sub>2</sub>O was added and stirred for 30 minutes. To this solution, 5 mL aqueous solution of potassium ferricyanide (16.46 mg, 0.05 mmol) was added and then heated at 50 °C for another 1 hour. The resultant mixture was then filtered and left for slow evaporation

at room temperature. Dark blue crystals suitable for single-crystal X-ray diffraction measurement were obtained after one week. The crystals were washed with water, dried and used for further characterization and other physical measurements. Elemental analysis: experimental (calculated for  $C_{90}H_{100}Co_3F_{18}Fe_2N_{30}O_{20}$ ): C, 42.82% (42.35%); H, 3.59% (3.95%); N, 16.39% (16.46%).

**IR data ( $cm^{-1}$ ):**  $\nu_{N-H}$  = 3339;  $\nu_{C-H}$  = 3108;  $\nu_{CN}$  = 2141, 2113, 2058, 2047, 2027, and  $\nu_{C=C}$  = 1437.

### **1.3. Physical measurements:**

#### **1.3.1. Crystal Data Collection and Structure Determination:**

Intensity data were collected on a 'Bruker D8-venture' diffractometer using a graphite monochromated  $MoK\alpha$  radiation ( $\lambda = 0.71073$ ) at 140 K. Data collections were performed using  $\phi$  and  $\omega$  scan. Olex2 was used as the graphical interface and the structures were solved with olex2.solve structure solution program using Charge Flipping and refined with the ShelXL refinement package using Least-Squares minimisation. All non-hydrogen atoms were refined anisotropically.<sup>1</sup> Octahedral distortion parameters were calculated by using software "Octadist".<sup>2</sup>

#### **1.3.2. Squid magnetometry:**

The magnetic study has been performed using a SQUID-VSM magnetometer. All samples were ground properly before measuring magnetic moment vs. temperature data, to minimize the reorientation of the crystalline particles under the applied DC field. All the measurement has been performed with an applied DC field of 10000 Oe from the 2 K to 300 K temperature range. The high temperature susceptibility measurement was performed by using oven module between 300 K and 430 K. The measured values were corrected for the experimentally measured contribution of the sample holder and the derived susceptibilities were corrected for the diamagnetism of the samples, estimated from Pascal's tables.

#### **1.3.3. Differential scanning calorimetry:**

The Differential Scanning Calorimetric study was performed on Perkin-Elmer, Pyris 6 type DSC 4000 instrument. Data collected and baseline correction was done using software version 11.0.0.0449. The data measurement was taken at a scan rate of 5 K/min.

#### **1.3.4. FT-Infrared spectroscopy:**

FT-IR spectra were recorded by using a Perkin-Elmer Spectrum BX Spectrometer between  $4000\text{ cm}^{-1}$  -  $400\text{ cm}^{-1}$  wavenumber.

#### **1.3.5. $^1\text{H-NMR}$ spectroscopy:**

$^1\text{H-NMR}$  spectroscopy measurement was performed on  $\text{CD}_3\text{OD}$  solution of ligand and the complex using Bruker's AVANCE-III 500 MHz NMR spectrometer. The data analysis was done by using MestReNova-15.0.1-35756 software.

#### **1.3.6. Thermogravimetric analysis:**

The Thermogravimetric analysis was performed on a Perkin-Elmer instrument at a scan rate of 5 K/min under  $\text{N}_2$  atmosphere.

#### **1.3.7. UV-visible spectroscopy:**

The solution phase UV-Visible spectroscopic data was collected using Cary 100 instrument using Scan Software Version 4.20(468) scanning between wavelength 200 nm to 800 nm at 298 K with subsequent addition of trifluoroacetic acid into the methanolic solution of the complex. While the solid state UV-Visible spectroscopic data was collected using Shimadzu UV-2600i instrument between wavelength 200 nm to 1200 nm.

#### **1.3.8. Cyclic voltammetry:**

The electrochemical study of the sample was measured by using VersaSTAT-3 instrument using software VersaStudio. The study was done by using three-electrode system consisting of glassy carbon as working electrode, Pt wire as a counter electrode and Ag/AgCl electrode as a reference electrode.  $5 \times 10^{-4}\text{ M}$  concentration of  $1\cdot 20\text{H}_2\text{O}$  was used for the data collection and 0.1 M of  $[\text{N}(\text{Bu})_4]\text{PF}_6$  was used as supporting electrolyte in anhydrous methanol. The scan range for the sample solutions were from 0 V to -0.40 to +1.2 V. The scanning cycle was performed anodically. The measurement was performed at a scan rate of 0.05 V/s at 298 K. For  $\text{K}_3[\text{Fe}(\text{CN})_6]$ ,  $1 \times 10^{-4}\text{ M}$  concentration in water was used and the measurement was performed using same three-electrode system with 0.1 M KCl as the supporting electrolyte. The scan range for the sample solutions were taken from 0 V to -0.05 to +0.6 V with a scan rate of 0.05 V/s at 298 K.

## 2. Result and Discussion:

### 2.1. Crystal structure determination:

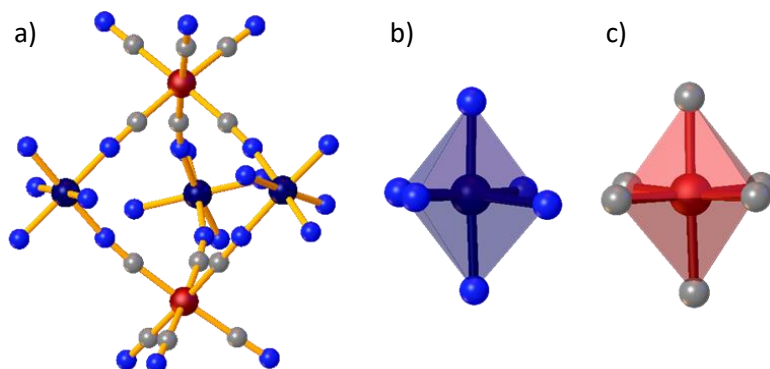

**Figure S1.** (a) Simplified structure and (b) and (c) coordination environment around Co and Fe centres, respectively, in complex  $1 \cdot 20\text{H}_2\text{O}$ . Colour code: brown (Fe), dark blue (Co), light blue (N) and grey (C).

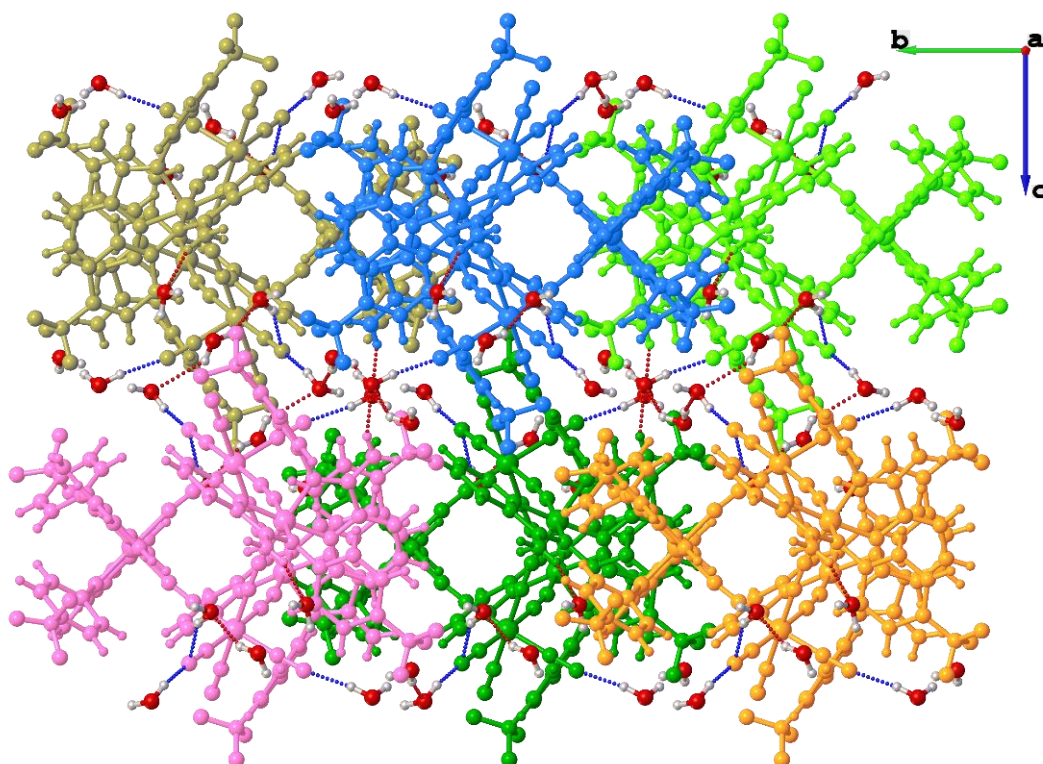

**Figure S2.** Crystal-packing along a-axis showing intermolecular hydrogen bonding interactions in complex  $1 \cdot 20\text{H}_2\text{O}$ . Each pentanuclear  $[\text{Fe}_2\text{Co}_3]$  units are represented with different colours.

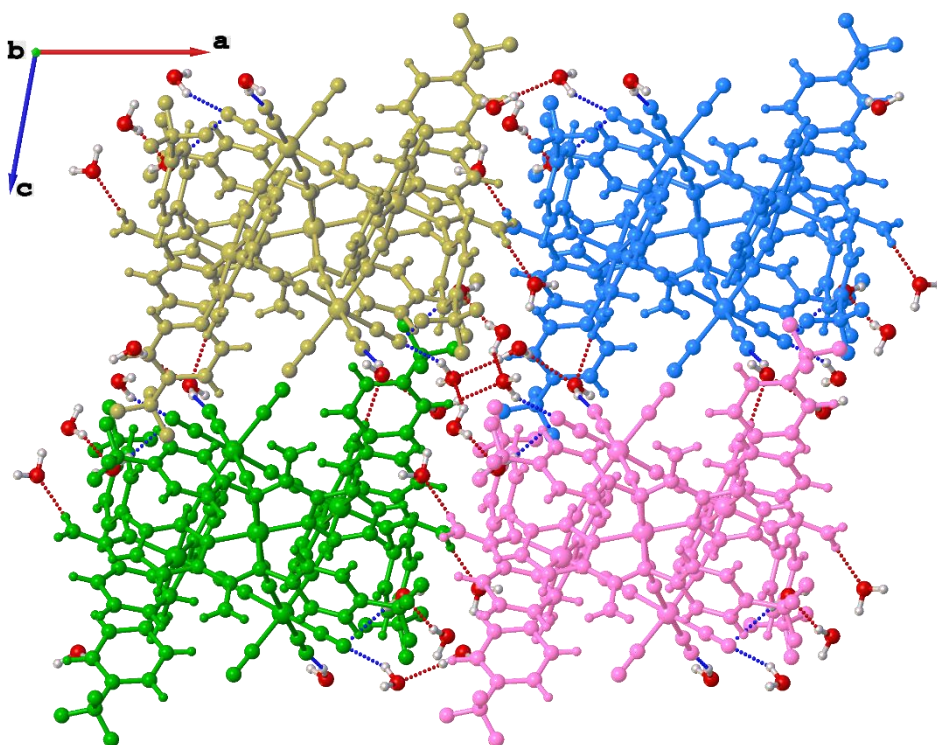

**Figure S3.** Crystal-packing along b-axis showing intermolecular hydrogen bonding interactions in complex  $1 \cdot 20\text{H}_2\text{O}$ . Each pentanuclear  $[\text{Fe}_2\text{Co}_3]$  units are represented with different colours.

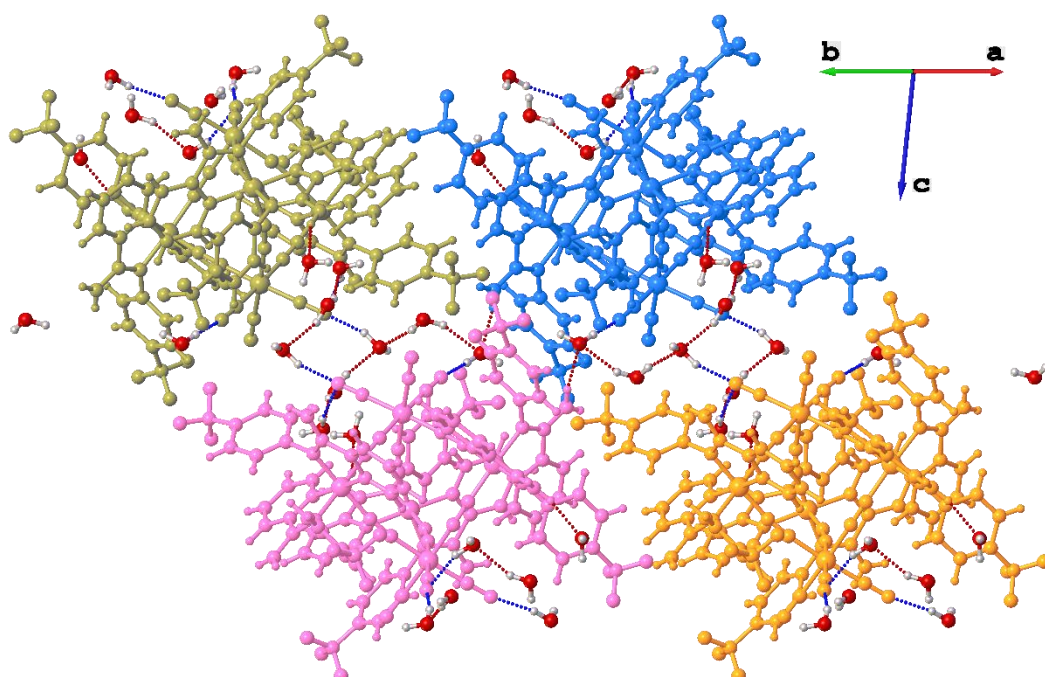

**Figure S4.** Crystal-packing along abc-dihedral angle showing intermolecular hydrogen bonding interactions in complex  $1 \cdot 20\text{H}_2\text{O}$ . Each pentanuclear  $[\text{Fe}_2\text{Co}_3]$  units are represented with different colours.

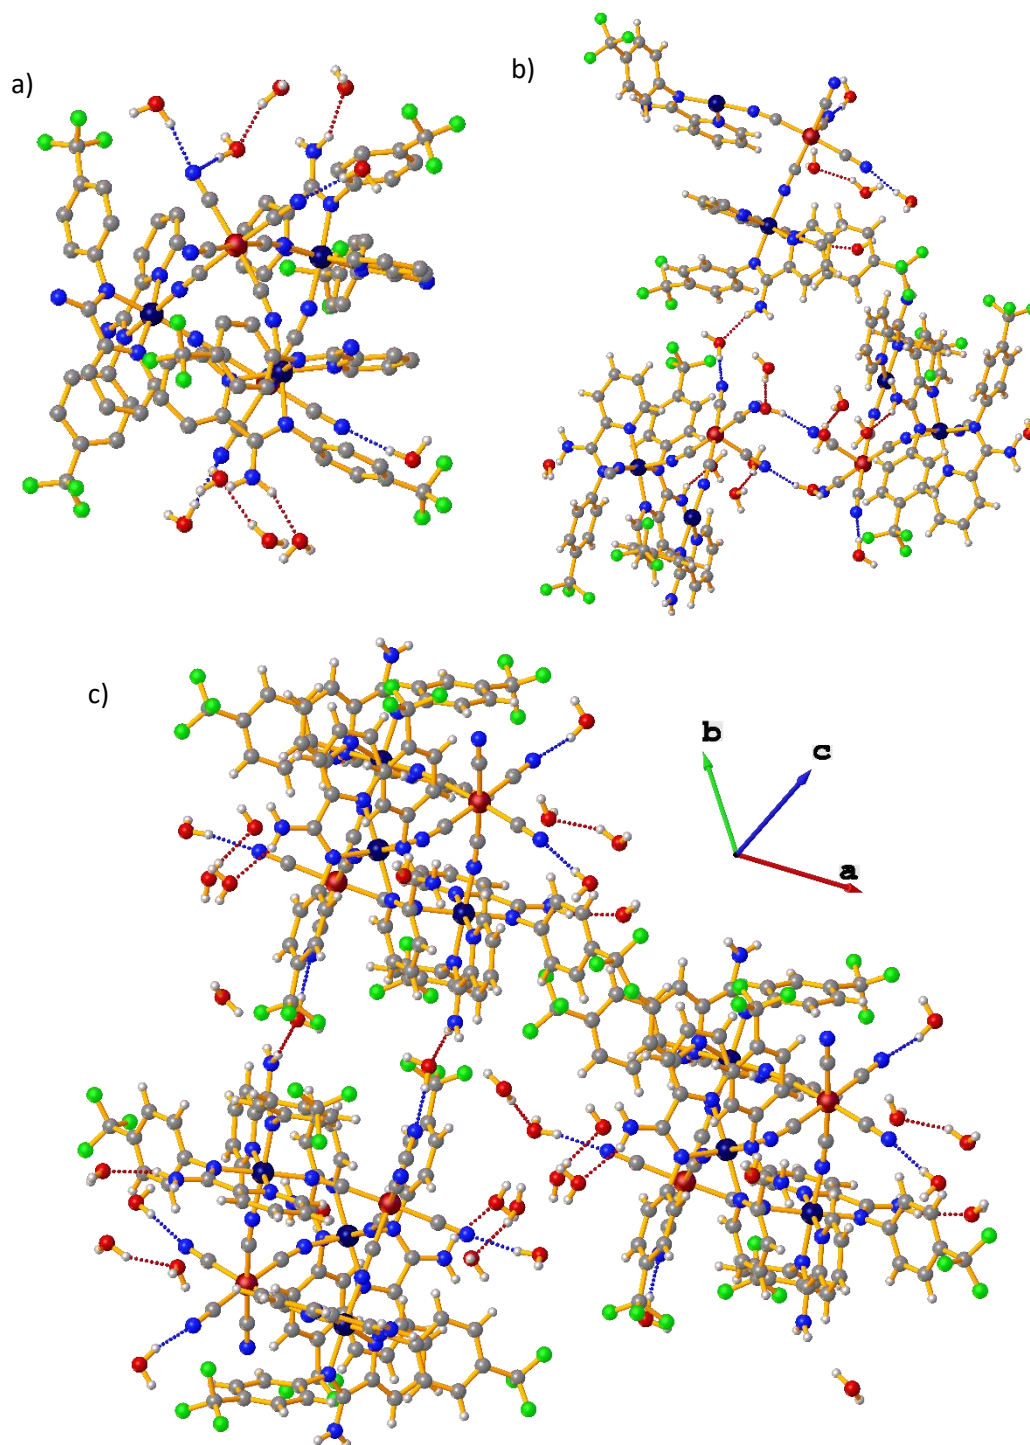

**Figure S5.** H-bonding interactions between solvent molecules and (a) [Fe<sub>2</sub>Co<sub>3</sub>] complete unit, (b) neighbouring asymmetric units and (c) neighbouring pentanuclear [Fe<sub>2</sub>Co<sub>3</sub>] units.



## 2.2. Crystallographic details:

**Table S1.** Crystallographic data for complex **1**·20H<sub>2</sub>O (with masked solvents).

|                                             |                                                                                                   |
|---------------------------------------------|---------------------------------------------------------------------------------------------------|
| Empirical formula                           | C <sub>45</sub> H <sub>42</sub> Co <sub>1.5</sub> F <sub>9</sub> FeN <sub>15</sub> O <sub>6</sub> |
| Formula weight                              | 1204.18                                                                                           |
| Temperature/K                               | 140.0                                                                                             |
| Crystal system                              | monoclinic                                                                                        |
| Space group                                 | C2/c                                                                                              |
| a/Å                                         | 28.9299(12)                                                                                       |
| b/Å                                         | 19.9584(12)                                                                                       |
| c/Å                                         | 23.2361(11)                                                                                       |
| α/°                                         | 90                                                                                                |
| β/°                                         | 100.411(2)                                                                                        |
| γ/°                                         | 90                                                                                                |
| Volume/Å <sup>3</sup>                       | 13195.5(12)                                                                                       |
| Z                                           | 8                                                                                                 |
| ρ <sub>calc</sub> /g/cm <sup>3</sup>        | 1.212                                                                                             |
| μ/mm <sup>-1</sup>                          | 0.667                                                                                             |
| F(000)                                      | 4900.0                                                                                            |
| Crystal size/mm <sup>3</sup>                | 0.25 × 0.13 × 0.04                                                                                |
| Radiation                                   | MoKα (λ = 0.71073)                                                                                |
| 2θ range for data collection/°              | 4.798 to 51.926                                                                                   |
| Index ranges                                | -35 ≤ h ≤ 35, -24 ≤ k ≤ 24, -28 ≤ l ≤ 28                                                          |
| Reflections collected                       | 99634                                                                                             |
| Independent reflections                     | 12726 [R <sub>int</sub> = 0.0684, R <sub>sigma</sub> = 0.0412]                                    |
| Data/restraints/parameters                  | 12726/0/717                                                                                       |
| Goodness-of-fit on F <sup>2</sup>           | 1.030                                                                                             |
| Final R indexes [I ≥ 2σ (I)]                | R <sub>1</sub> = 0.0461, wR <sub>2</sub> = 0.1187                                                 |
| Final R indexes [all data]                  | R <sub>1</sub> = 0.0592, wR <sub>2</sub> = 0.1277                                                 |
| Largest diff. peak/hole / e Å <sup>-3</sup> | 0.59/-0.51                                                                                        |

**Table S2.** Bond lengths around the Fe and Co centres in complex **1**·20H<sub>2</sub>O.

| Atoms |                  | Bond length(Å) |
|-------|------------------|----------------|
| Co1   | N4               | 1.927(2)       |
| Co1   | N8               | 1.886(2)       |
| Co1   | N7               | 1.894(2)       |
| Co1   | N3               | 1.927(2)       |
| Co1   | N1               | 1.934(2)       |
| Co1   | N6               | 1.938(2)       |
| Fe1   | C28              | 1.894(3)       |
| Fe1   | C27 <sup>1</sup> | 1.901(3)       |
| Fe1   | C32              | 1.899(3)       |
| Fe1   | C30              | 1.920(3)       |
| Fe1   | C29              | 1.909(3)       |
| Fe1   | C31              | 1.913(3)       |
| Co2   | N13              | 1.938(2)       |
| Co2   | N13 <sup>1</sup> | 1.938(2)       |
| Co2   | N15              | 1.930(2)       |
| Co2   | N15 <sup>1</sup> | 1.930(2)       |
| Co2   | N12              | 1.878(3)       |
| Co2   | N12 <sup>1</sup> | 1.878(3)       |

**Table S3.** Distortion parameters<sup>2</sup> for Fe and Co centres in complex **1**·20H<sub>2</sub>O.

| Metal centre | <D> (Å) | Z (Å)    | Δ        | Σ (°)   | Θ (°)    |
|--------------|---------|----------|----------|---------|----------|
| <b>Co1</b>   | 1.9178  | 0.111647 | 0.000111 | 32.0493 | 115.4752 |
| <b>Co2</b>   | 1.9154  | 0.149127 | 0.000193 | 36.0423 | 122.8782 |
| <b>Fe1</b>   | 1.9059  | 0.047246 | 0.000021 | 15.4210 | 38.2567  |

**Table S4.** Bond angles around Fe and Co centres in complex 1·20H<sub>2</sub>O.

| Atoms            |     |                  | Bond angles (°) | Atoms            |     |                  | Bond angles (°) |
|------------------|-----|------------------|-----------------|------------------|-----|------------------|-----------------|
| N4               | Co1 | N3               | 90.16(9)        | C28              | Fe1 | C27 <sup>1</sup> | 87.77(10)       |
| N4               | Co1 | N1               | 93.79(9)        | C28              | Fe1 | C32              | 87.13(11)       |
| N4               | Co1 | N6               | 82.11(9)        | C28              | Fe1 | C30              | 92.22(12)       |
| N8               | Co1 | N4               | 175.77(9)       | C28              | Fe1 | C29              | 90.10(12)       |
| N8               | Co1 | N7               | 90.19(9)        | C28              | Fe1 | C31              | 176.90(11)      |
| N8               | Co1 | N3               | 89.82(9)        | C27 <sup>1</sup> | Fe1 | C30              | 178.03(12)      |
| N8               | Co1 | N1               | 90.40(9)        | C27 <sup>1</sup> | Fe1 | C29              | 90.50(12)       |
| N8               | Co1 | N6               | 93.68(9)        | C27 <sup>1</sup> | Fe1 | C31              | 89.33(11)       |
| N7               | Co1 | N4               | 90.14(9)        | C32              | Fe1 | C27 <sup>1</sup> | 88.52(11)       |
| N7               | Co1 | N3               | 175.86(10)      | C32              | Fe1 | C30              | 89.51(12)       |
| N7               | Co1 | N1               | 93.67(9)        | C32              | Fe1 | C29              | 177.10(12)      |
| N7               | Co1 | N6               | 90.16(9)        | C32              | Fe1 | C31              | 91.70(13)       |
| N3               | Co1 | N1               | 82.19(10)       | C29              | Fe1 | C30              | 91.47(12)       |
| N3               | Co1 | N6               | 93.97(9)        | C29              | Fe1 | C31              | 91.02(13)       |
| N1               | Co1 | N6               | 174.40(9)       | C31              | Fe1 | C30              | 90.64(12)       |
| N13 <sup>1</sup> | Co2 | N13              | 173.10(14)      |                  |     |                  |                 |
| N15 <sup>1</sup> | Co2 | N13              | 93.30(10)       |                  |     |                  |                 |
| N15              | Co2 | N13 <sup>1</sup> | 93.30(10)       |                  |     |                  |                 |
| N15              | Co2 | N13              | 81.86(10)       |                  |     |                  |                 |
| N15 <sup>1</sup> | Co2 | N13 <sup>1</sup> | 81.86(10)       |                  |     |                  |                 |
| N15              | Co2 | N15 <sup>1</sup> | 91.40(15)       |                  |     |                  |                 |
| N12 <sup>1</sup> | Co2 | N13              | 90.20(10)       |                  |     |                  |                 |
| N12 <sup>1</sup> | Co2 | N13 <sup>1</sup> | 94.66(11)       |                  |     |                  |                 |
| N12              | Co2 | N13              | 94.66(11)       |                  |     |                  |                 |
| N12              | Co2 | N13 <sup>1</sup> | 90.20(10)       |                  |     |                  |                 |
| N12              | Co2 | N15 <sup>1</sup> | 89.20(10)       |                  |     |                  |                 |
| N12              | Co2 | N15              | 176.50(11)      |                  |     |                  |                 |
| N12 <sup>1</sup> | Co2 | N15              | 89.20(10)       |                  |     |                  |                 |
| N12 <sup>1</sup> | Co2 | N15 <sup>1</sup> | 176.49(11)      |                  |     |                  |                 |
| N12 <sup>1</sup> | Co2 | N12              | 90.41(14)       |                  |     |                  |                 |

**Table S5.** Hydrogen bonding interactions considering maximum 2.9 Å bond distances and minimum 120° bond angles.

| Atoms    | Bond length (Å) |
|----------|-----------------|
| N2...O4  | 2.898           |
| N5...O6  | 2.823           |
| O6...N5  | 2.799           |
| O1...N10 | 2.817           |
| O5...O6  | 2.899           |
| O5...O1  | 2.766           |
| O3...O2  | 2.829           |

### 2.3. Solid-state UV-visible spectroscopy study:

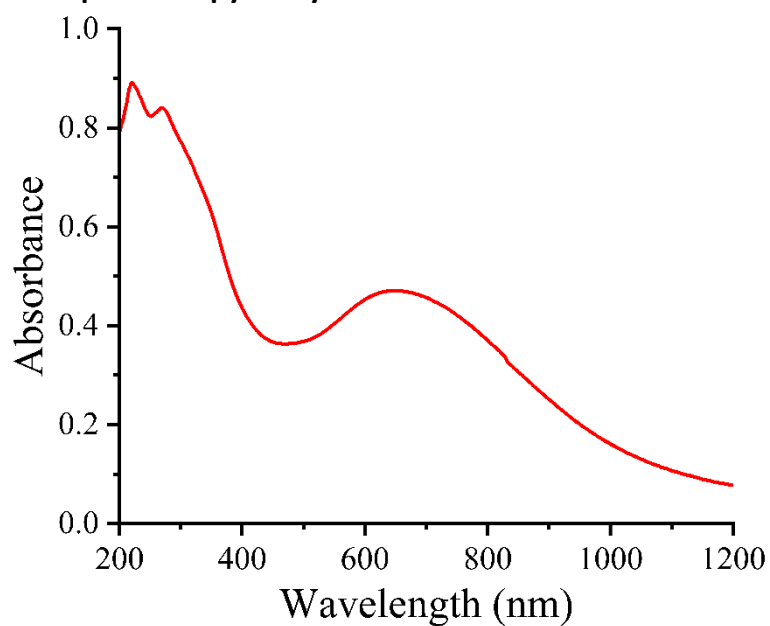

**Figure S6.** Solid-state UV-visible spectrum of the complex 1·20H<sub>2</sub>O.

## 2.4. Magnetic study:

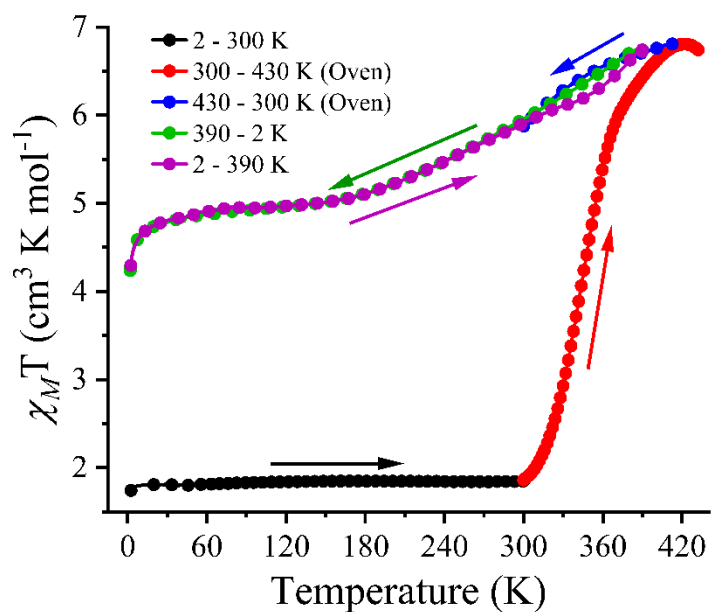

**Figure S7.**  $\chi_M T$  vs.  $T$  plot of the complex  $1 \cdot 20H_2O$  (between 2 - 300 - 430 K) and  $1$  (between 430 - 300 K and 390 - 2 - 390 K) at a constant magnetic field of 10000 Oe.

## 2.5. Differential scanning calorimetric study:

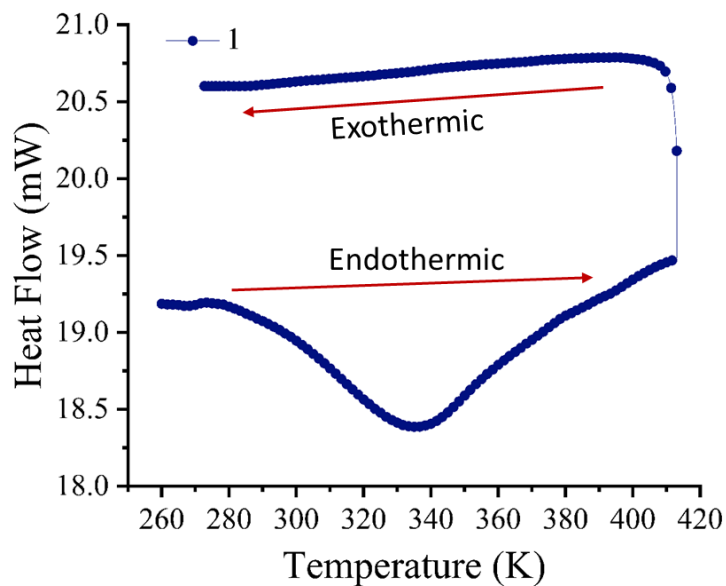

**Figure S8.** DSC study of complex  $1 \cdot 20H_2O$ .

## 2.6. Infrared spectroscopic studies with acid addition:

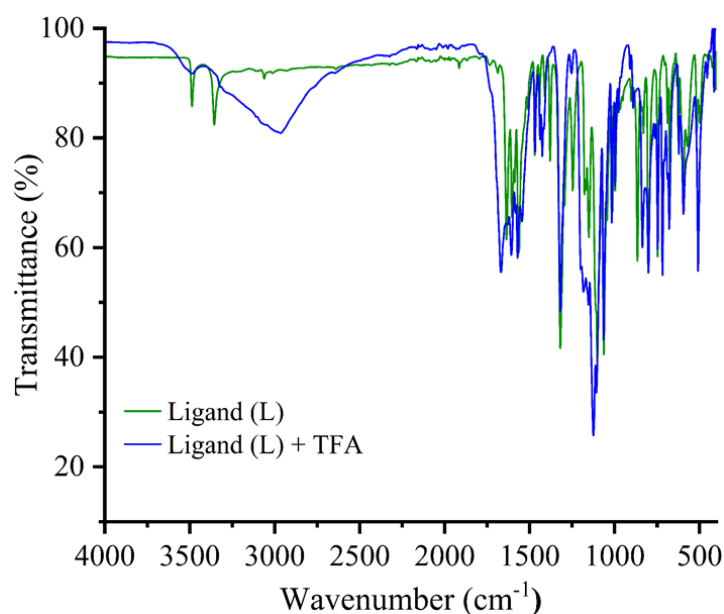

**Figure S9.** IR of ligand (L) before (green) and after (blue) addition of trifluoroacetic acid (TFA).

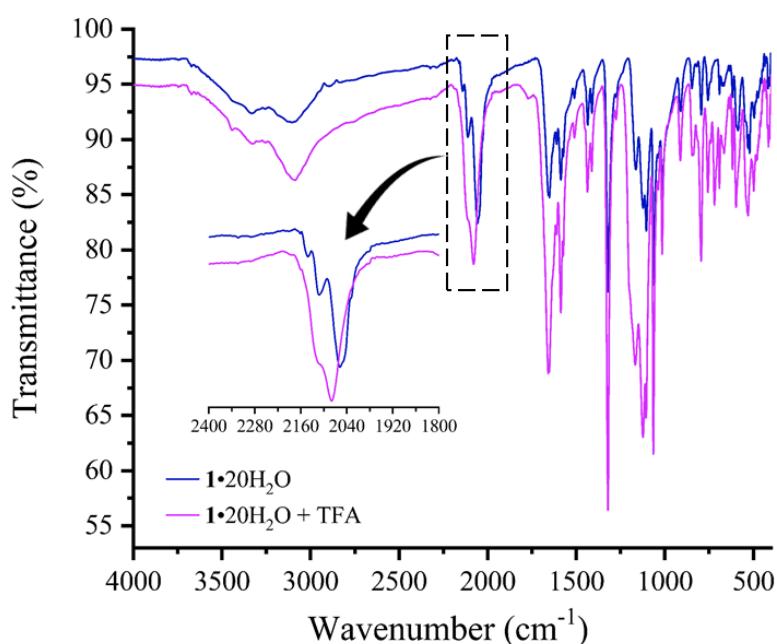

**Figure S10.** IR of complex **1**·20H<sub>2</sub>O before (blue) and after (magenta) addition of TFA.

The complex **1**·20H<sub>2</sub>O gives  $\nu_{\text{CN}}$  stretching frequencies at 2141, 2113, 2058, 2047 and 2027 cm<sup>-1</sup> corresponds to the presence of [Fe<sup>II</sup><sub>LS</sub>( $\mu$ CN)Co<sup>III</sup><sub>LS</sub>] as well as [Fe<sup>III</sup><sub>LS</sub>( $\mu$ CN)Co<sup>II</sup><sub>HS</sub>].<sup>3</sup> Upon addition of the trifluoroacetic acid (TFA), the  $\nu_{\text{CN}}$  stretching frequencies shifts to higher wavenumber 2114 and 2080 cm<sup>-1</sup> corresponds to the presence of only [Fe<sup>III</sup><sub>LS</sub>( $\mu$ CN)Co<sup>II</sup><sub>HS</sub>] configurations. The  $\nu_{\text{NH}_2}$  stretching frequency at 3339 cm<sup>-1</sup> shifts to lower wavenumber 3327 cm<sup>-1</sup> indicating protonation at the -NH<sub>2</sub> site forming -<sup>+</sup>NH<sub>3</sub>.<sup>4</sup>

Similarly, the  $\nu_{\text{NH}_2}$  stretching frequency of the ligand shifts to a higher wavenumber upon addition of TFA, justifying the protonation at -NH<sub>2</sub> sites.

## 2.7. <sup>1</sup>H-NMR study:

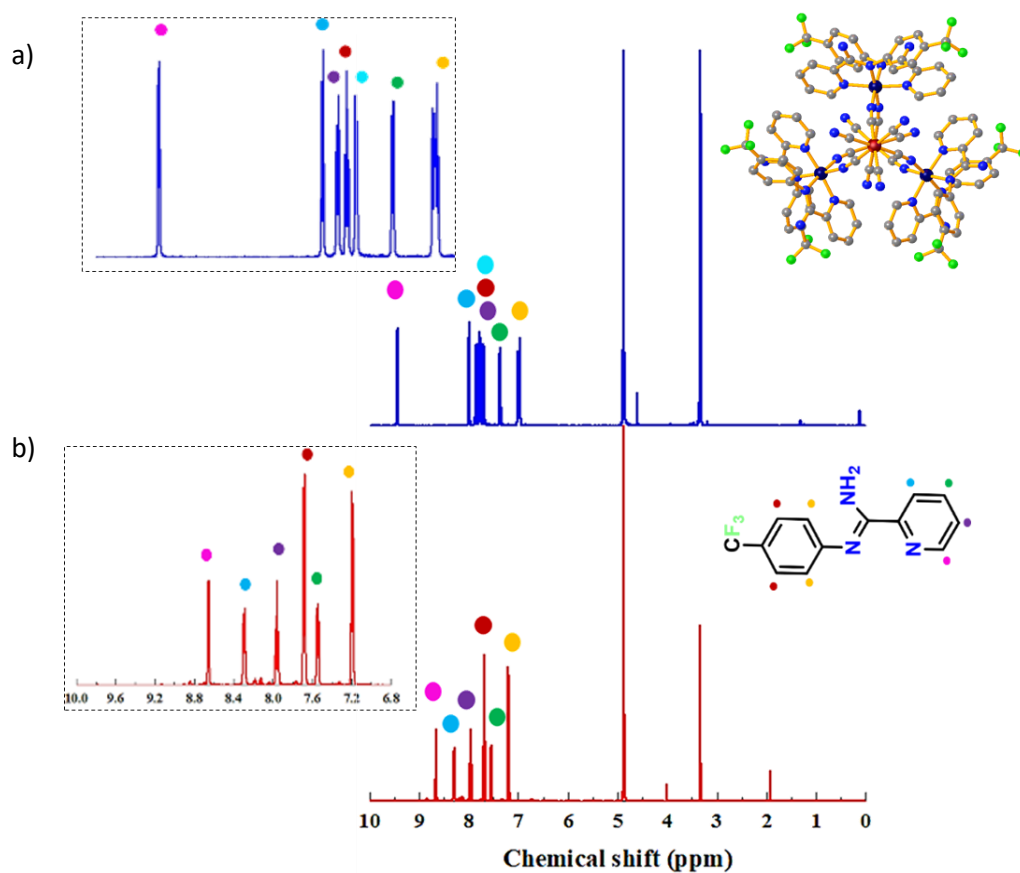

**Figure S11.** <sup>1</sup>H-NMR shift of (a) complex **1**·20H<sub>2</sub>O and (b) ligand (L) in CD<sub>3</sub>OD showing peaks for the labelled protons. Insets shows the enlarged spectra between 6.8 to 10 ppm.

**Table S6.** <sup>1</sup>H-NMR shift observed in ligand and in complex **1**·20H<sub>2</sub>O.

| $\delta$ (ppm) for L                        | $\delta$ (ppm) for Complex <b>1</b>         | <sup>1</sup> H-NMR shift of ligand after complex formation |
|---------------------------------------------|---------------------------------------------|------------------------------------------------------------|
| <span style="color: magenta;">●</span> 8.65 | <span style="color: magenta;">●</span> 9.43 | downfield                                                  |
| <span style="color: cyan;">●</span> 8.29    | <span style="color: cyan;">●</span> 7.98    | upfield                                                    |
| <span style="color: purple;">●</span> 7.956 | <span style="color: purple;">●</span> 7.85  | upfield                                                    |
| <span style="color: red;">●</span> 7.68     | <span style="color: red;">●</span> 7.77     | downfield                                                  |
| ----                                        | <span style="color: cyan;">●</span> 7.68    | new peak                                                   |
| <span style="color: green;">●</span> 7.54   | <span style="color: green;">●</span> 7.36   | upfield                                                    |
| <span style="color: yellow;">●</span> 7.19  | <span style="color: yellow;">●</span> 6.97  | upfield                                                    |

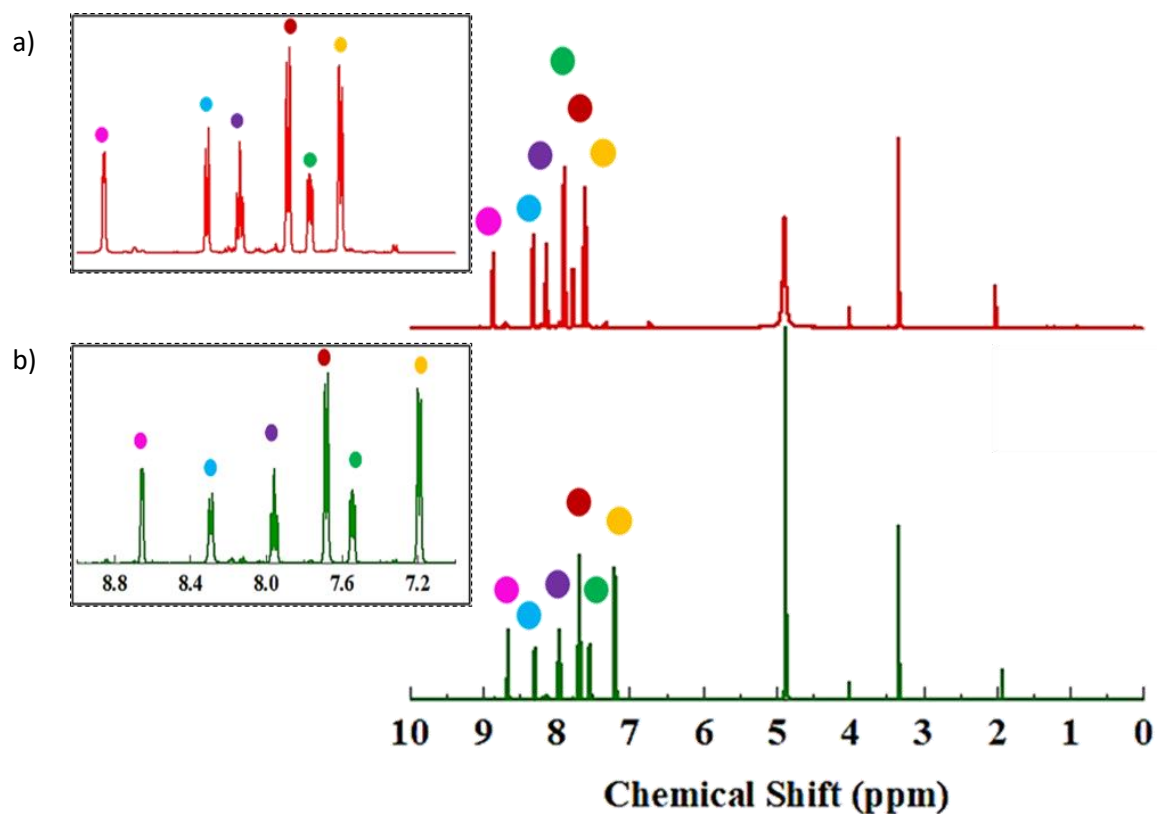

**Figure S12:**  $^1\text{H-NMR}$  NMR shift comparison of ligand (L) (a) after and (b) before TFA addition in  $\text{CD}_3\text{OD}$ . Enlarged spectra corresponding to the labelled protons between 6.8 to 9 ppm is shown in the insets.

**Table S7.**  $^1\text{H-NMR}$  shift comparison of ligand (L) before and after TFA addition.

| $\delta$ (ppm) for L | $\delta$ (ppm) for L after TFA addition | Nature of shift after TFA addition |
|----------------------|-----------------------------------------|------------------------------------|
| ● 8.65               | ● 8.85                                  | downfield                          |
| ● 8.29               | ● 8.31                                  | downfield                          |
| ● 7.956              | ● 8.137                                 | downfield                          |
| ● 7.68               | ● 7.88                                  | downfield                          |
| ● 7.54               | ● 7.76                                  | downfield                          |
| ● 7.19               | ● 7.6                                   | downfield                          |



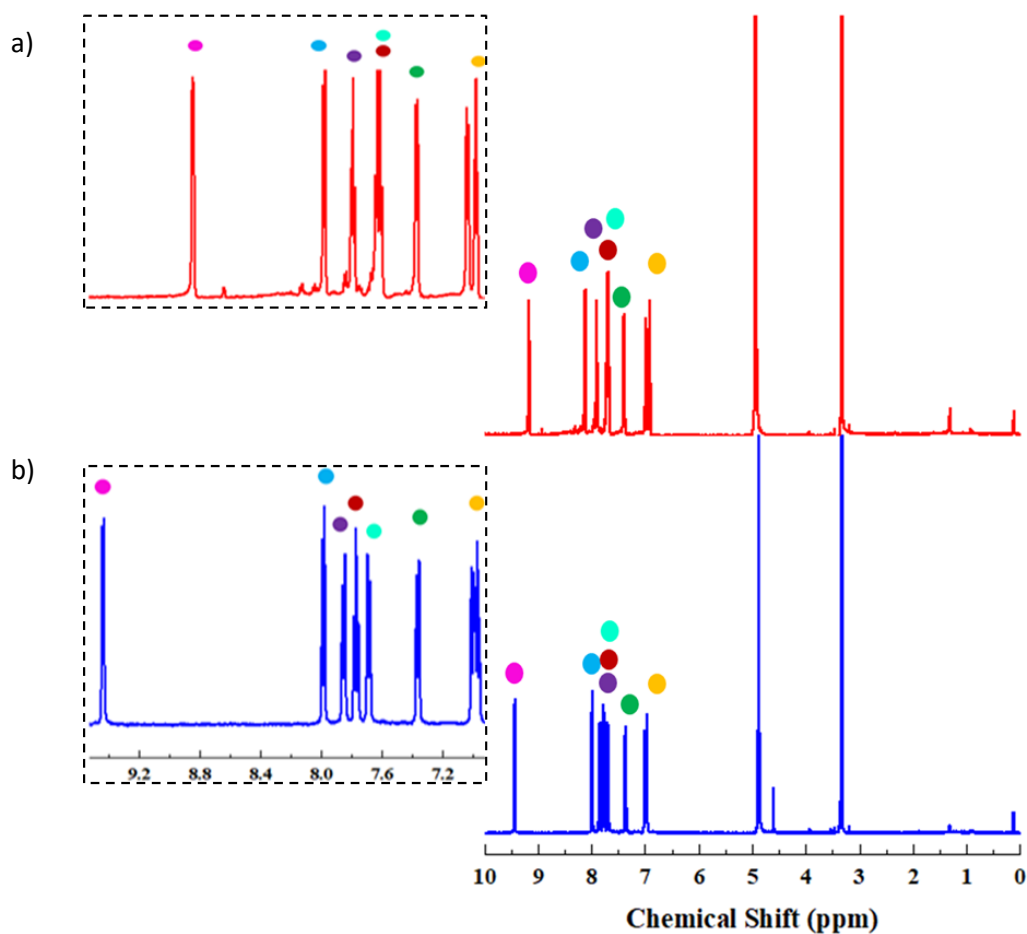

**Figure S13.**  $^1\text{H-NMR}$  shift of complex **1** (a) after and (b) before TFA addition in  $\text{CD}_3\text{OD}$ . Enlarged spectra corresponding to the labelled protons between 6.8 to 9 ppm is shown in the insets.

**Table S8.**  $^1\text{H-NMR}$  shift comparison of complex **1**· $20\text{H}_2\text{O}$  before and after TFA addition.

| $\delta$ (ppm) for Complex <b>1</b> | $\delta$ (ppm) for complex <b>1</b> · $20\text{H}_2\text{O}$ after TFA addition | Nature of shift after TFA addition |
|-------------------------------------|---------------------------------------------------------------------------------|------------------------------------|
| ● 9.43                              | ● 9.18                                                                          | upfield                            |
| ● 7.98                              | ● 8.11                                                                          | downfield                          |
| ● 7.85                              | ● 7.72                                                                          | upfield                            |
| ● 7.77                              | ● 7.88                                                                          | downfield                          |
| ● 7.68                              | ● 7.67                                                                          | upfield                            |
| ● 7.364                             | ● 7.38                                                                          | downfield                          |
| ● 6.97                              | ● 6.91                                                                          | upfield                            |

NMR spectra of ligand (**L**) and complex **1**·20H<sub>2</sub>O were recorded in CD<sub>3</sub>OD at 298 K. A comparative <sup>1</sup>H NMR spectra of **L**, and **1**·20H<sub>2</sub>O are presented in Figure S11 and changes in chemical shift value after complex formation are highlighted in Table S6. All the aromatic protons of **L** resonate in the expected range of 7.19-8.65 ppm, which shifted after complex formation and resonates in the range of 6.97-9.43 ppm. Interestingly, it is found that protons highlighted in pink and brown colour are shown downfield, and other protons are shown upfield due to the coordination of both the nitrogen atoms of **L** to Co metal center of **1**·20H<sub>2</sub>O. The chemical shift value of the proton highlighted in pink colour resonates at 8.66 ppm (in **L**), which shifted downfield to 9.44 ppm (in **1**·20H<sub>2</sub>O) due to the deshielding effect in the metal complex. The effect of the addition of TFA in <sup>1</sup>H NMR spectra of **L** is presented in Figure S12 and the changes in chemical shift values before and after TFA addition are summarized in Table S7. It is found that, after protonation, all the aromatic protons are deshielded and appear in the range of 7.6-8.85 ppm.

Similarly, the effect of TFA addition to the complex **1**·20H<sub>2</sub>O is highlighted in Figure S15 and data on chemical shift value is summarised in Table S8. Surprisingly, it was found that few of the aromatic protons showed upfield shifting after complex formation and appeared in the range of 6.91-9.18 ppm. From Figure S13 and Table S8, it is concluded that protons highlighted as pink, navy blue, orange and brown colours are shown upfield and other protons are shown downfield. After the addition of TFA, these changes happen due to the protonation of the free amine group present in the system. After protonation, it creates a positive charge on the nitrogen atom of amine, increases electrophilicity, and changes the electronic environment in the entire system. As a result, the redox potential of the metal complex changes, which is responsible for metal-to-metal charge transfer-induced spin transition in the entire system.

## 2.8. Thermogravimetric analysis:

Thermogravimetric analysis (TGA) of complex  $1 \cdot 20\text{H}_2\text{O}$  is carried out in  $\text{N}_2$  atmosphere at heating rate of  $5\text{ }^\circ\text{C}/\text{min}$ . The TGA data reveals a gradual loss of 14.5 % of its total sample weight in the range of  $30\text{ }^\circ\text{C}$  -  $100\text{ }^\circ\text{C}$  which can be attributed to the loss of approximately 20 water molecules. Above  $241\text{ }^\circ\text{C}$ , the weight loss corresponds to the disintegration of the structural framework.

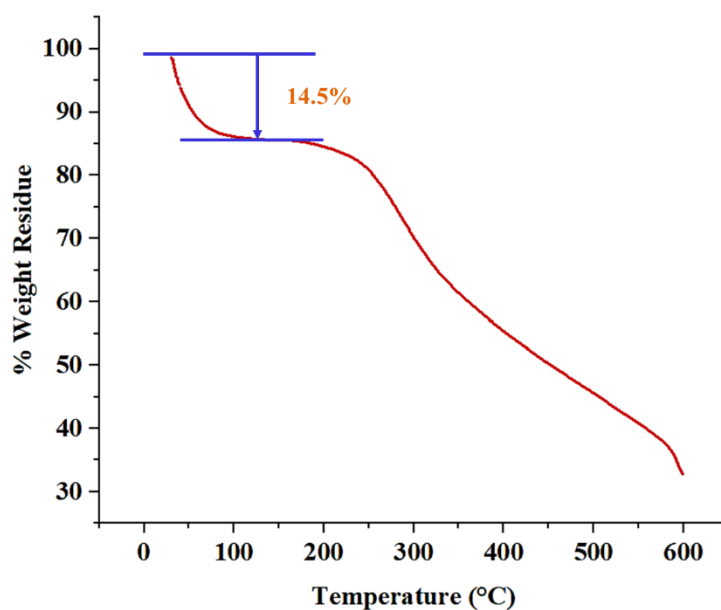

**Figure S14.** TGA of complex  $1 \cdot 20\text{H}_2\text{O}$ .

## 2.9. Cyclic voltametric study:

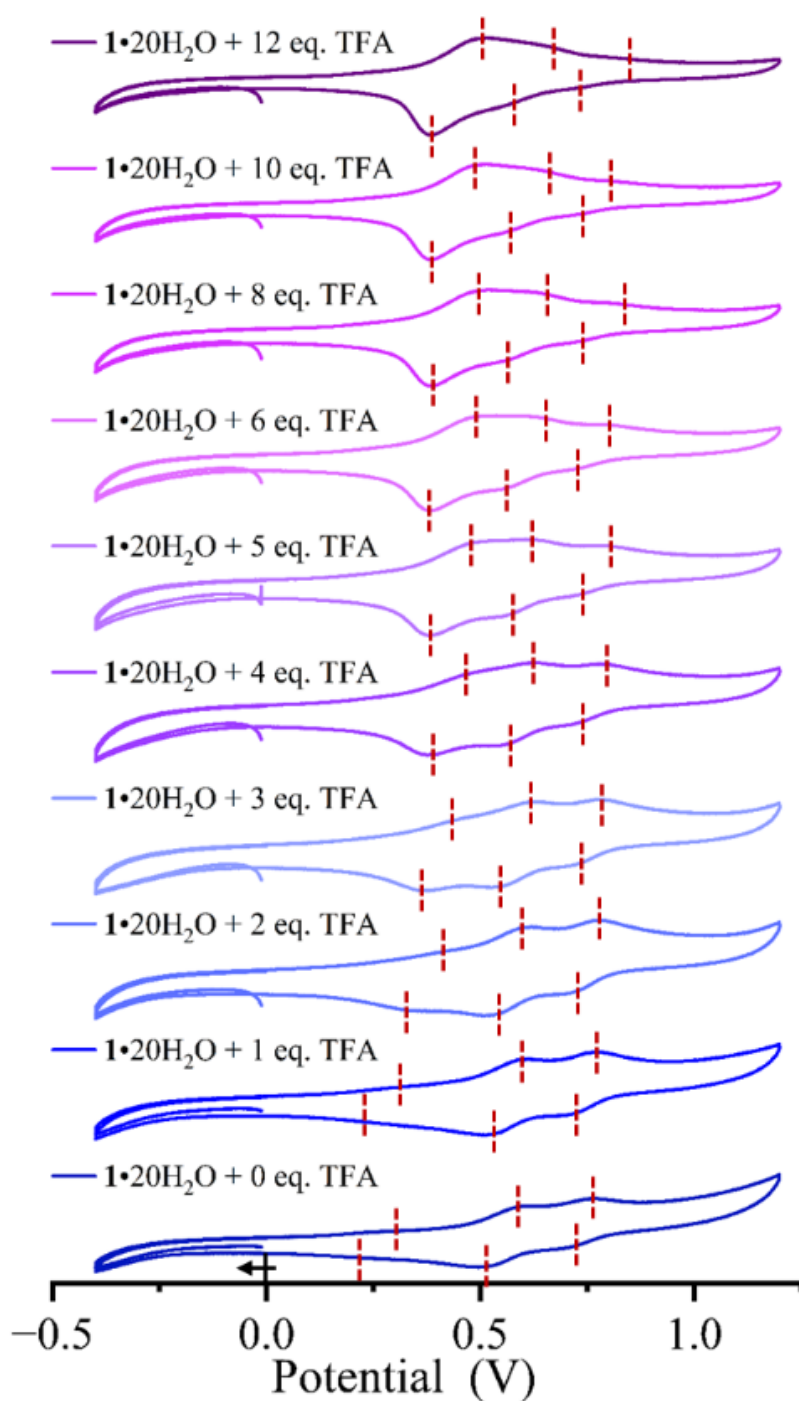

**Figure S15.** Electrochemical spectra with subsequent addition of TFA into the methanolic solution of complex  $1 \cdot 20\text{H}_2\text{O}$ .

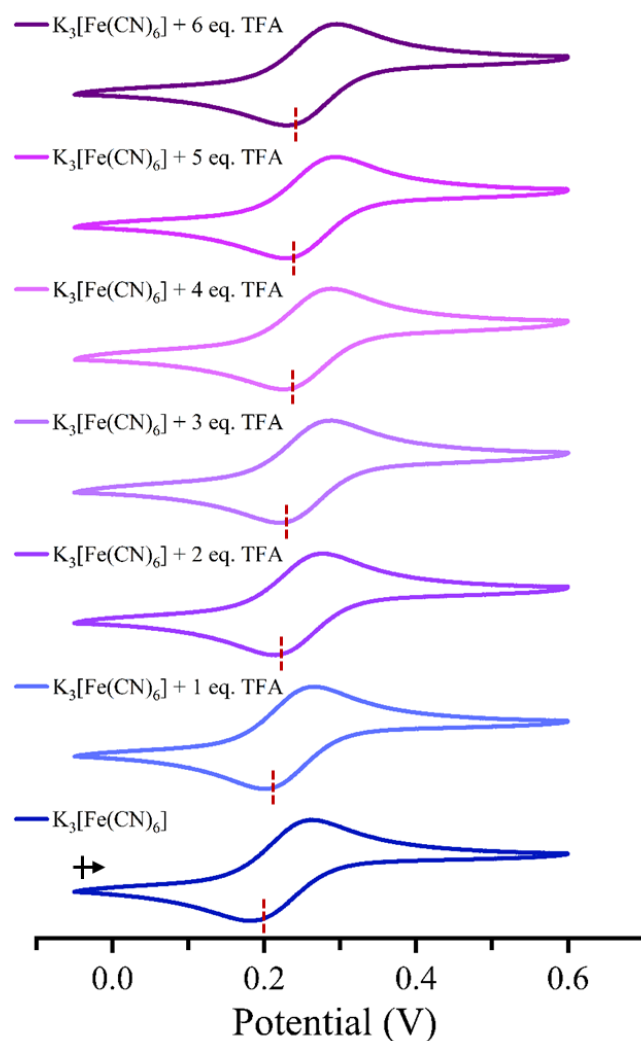

**Figure S16.** Electrochemical spectra with subsequent addition of TFA into the aqueous solution of  $K_3[Fe(CN)_6]$ .

### 3. References:

1. O. V. Dolomanov, L. J. Bourhis, R. J. Gildea, J. A. K. Howard, and H. Puschmann, *J. Appl. Cryst.*, 2009, **42**, 339-341.
2. R. Ketkaew et al. *Octadist.* 2019.
3. C. P. Berlinguette, A. Dragulescu-Andrasi, A. Sieber, H. U. Gudel, C. Achim, K. R. Dunbar, *J. Am. Chem. Soc.*, 2005, **127**, 6766-6779.
4. J. M. Price, M. W. Crofton and Y. T. Lee, *J. Phys. Chem.*, 1991, **95**, 2182-2195.
